# Supplementary material for: Gaps in care of patients living with pulmonary fibrosis: a joint patient and expert statement on the results of a Europe-wide survey
Source: PubMed Central journal article supplement — ERJ Open Res. 2019 Oct 21;5(4):00124-2019. doi: 10.1183/23120541.00124-2019 (PMC6801215; doi:10.1183/23120541.00124-2019), 2019-10-21
Supplement: 00124-2019.S1.pdf [file 00124-2019.S1.pdf]

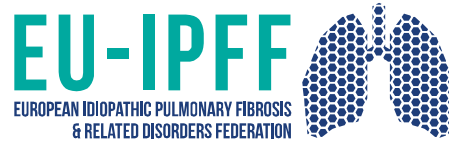

## Your experience of living with Idiopathic Pulmonary Fibrosis (IPF) or another form of Pulmonary Fibrosis (PF)

Thank you for agreeing to take part in this survey about living with IPF or PF. You can fill in the questionnaire yourself or your carer can do it for you. It will take about half an hour. The information you share will give EU-IPFF, the patients' European federation, a better understanding of the needs of IPF and PF patients and may help to improve services in the future. Your name will not be requested to complete this questionnaire.

- English plain review
- Translated in DE/FR/EL/ES/BG/IT/NL/PT/PL
- Time to complete: 25 minutes
- Online distribution
- Consent form requested before questionnaire is completed

| General information about you |  |
|-------------------------------|--|
|                               |  |

|                                                                                                                                                                                                                                                  |                                                         |
|--------------------------------------------------------------------------------------------------------------------------------------------------------------------------------------------------------------------------------------------------|---------------------------------------------------------|
| I am a patient / carer. (If you are a carer or family member, please answer on behalf of the person you care for).                                                                                                                               | Relationship to the disease                             |
| I have IPF or another type of PF                                                                                                                                                                                                                 | Specific disease                                        |
| I am male / female                                                                                                                                                                                                                               | Gender distribution                                     |
| My age                                                                                                                                                                                                                                           | Age distribution                                        |
| Country I live in                                                                                                                                                                                                                                | Geographical distribution                               |
| <b>Information about your IPF or PF</b>                                                                                                                                                                                                          |                                                         |
|                                                                                                                                                                                                                                                  |                                                         |
| Is there a history of IPF or PF in your family?                                                                                                                                                                                                  | Family history of the disease                           |
| In which year were you diagnosed with IPF?                                                                                                                                                                                                       | Age at diagnosis                                        |
| Some countries have a national registry which collects health information from patients and uses it to improve knowledge and treatment of the disease. Do you know if there is an IPF (not PF) registry in your country? Yes / No / I don't know | Awareness of existence of IPF registry at Country Level |
| Do you know if there is a registry for PF (not IPF) in your country? Yes / No / I don't know                                                                                                                                                     | Awareness of existence of PF registry at Country Level  |
| Do you contribute to the collection of registry data? Yes / No                                                                                                                                                                                   | Involvement in IPF/PF registry                          |
| <b>Your experience of interacting with doctors</b>                                                                                                                                                                                               |                                                         |
|                                                                                                                                                                                                                                                  |                                                         |

|                                                                                                                                                                                                                                                                                                                                                          |                                                                                |
|----------------------------------------------------------------------------------------------------------------------------------------------------------------------------------------------------------------------------------------------------------------------------------------------------------------------------------------------------------|--------------------------------------------------------------------------------|
| Did your doctor give you information on your disease when you were diagnosed?                                                                                                                                                                                                                                                                            | Assessment of availability of information for patients                         |
| If yes, what type of information did you receive?                                                                                                                                                                                                                                                                                                        | Assessment of type of information provided to patients                         |
| Did you understand the information you were given?                                                                                                                                                                                                                                                                                                       | Assessment of accessibility of information for patients                        |
| Did you have enough time to discuss your diagnosis with your doctor? Yes/ No                                                                                                                                                                                                                                                                             | Assessment of time availability for information on diagnosis                   |
| How would you describe your experience of discussing your diagnosis with your doctor? (scale 1 to 5: 1= strong positive; 2=positive; 3=neutral; 4=negative; 5=strong negative)                                                                                                                                                                           | Assessment of quality of exchanges on diagnosis                                |
| Besides your family doctor, did you have access to any other healthcare professionals to discuss your diagnosis? Yes / no                                                                                                                                                                                                                                | Availability of members of multidisciplinary team for information on diagnosis |
| If yes, please say which of the following you spoke with : <ul style="list-style-type: none"> <li>• respiratory (lung) doctor (also known as a pulmonologist)</li> <li>• radiologist</li> <li>• specialist respiratory nurse</li> <li>• physiotherapist</li> <li>• rheumatologist</li> <li>• psychologist</li> <li>• thoracic (chest) surgeon</li> </ul> | Access to multidisciplinary team                                               |

|                                                                                                                                                                                                                                        |                                                               |
|----------------------------------------------------------------------------------------------------------------------------------------------------------------------------------------------------------------------------------------|---------------------------------------------------------------|
| <ul style="list-style-type: none"> <li>• other, please specify</li> </ul>                                                                                                                                                              |                                                               |
| Did you get training or educational activities from your treating centre? Yes / No                                                                                                                                                     | Existence of dedicated training for IPF and PF patients       |
| How could health care staff work more effectively with you and your carers? Please give us your suggestions and recommendations                                                                                                        | Recommendations                                               |
| <b>Genetic screening</b>                                                                                                                                                                                                               |                                                               |
|                                                                                                                                                                                                                                        |                                                               |
| Did you have a genetic test? This is a test to examine your genes to find out how likely you are to get IPF or PF. Yes / No                                                                                                            | Access to genetic testing                                     |
| If yes, did you get enough information about this test?                                                                                                                                                                                | Quality of information on genetic testing for IPF/PF patients |
| <b>Your referral</b>                                                                                                                                                                                                                   |                                                               |
|                                                                                                                                                                                                                                        |                                                               |
| How much time passed before your family doctor referred you to a respiratory doctor? <ul style="list-style-type: none"> <li>• Less than a month</li> <li>• Between one and two months</li> <li>• Between two and six months</li> </ul> | Delay in access to respiratory physician                      |

|                                                                                                                                                                                                                                                                                                                                                          |                                              |
|----------------------------------------------------------------------------------------------------------------------------------------------------------------------------------------------------------------------------------------------------------------------------------------------------------------------------------------------------------|----------------------------------------------|
| <ul style="list-style-type: none"> <li>• Between six and twelve months</li> <li>• More than a year</li> </ul>                                                                                                                                                                                                                                            |                                              |
| <p>How much time passed between the first consultation with your family doctor and your referral to a specialist lung centre?</p> <ul style="list-style-type: none"> <li>• Less than a month</li> <li>• Between one and two months</li> <li>• Between two and six months</li> <li>• Between six and twelve months</li> <li>• More than a year</li> </ul> | <p>Delay in access to specialist care</p>    |
| <p>Did you get a wrong diagnosis before you were diagnosed with IPF or PF? Yes / No</p>                                                                                                                                                                                                                                                                  | <p>Delay in access to accurate diagnosis</p> |
| <p>If yes, how much time passed between your first (wrong) diagnosis and your diagnosis with IPF or PF?</p> <ul style="list-style-type: none"> <li>• Less than a month</li> <li>• Between one and two months</li> <li>• Between two and six months</li> <li>• Between six and twelve months</li> </ul>                                                   | <p>Delay in access to accurate diagnosis</p> |

|                                                                                                                                                                                                                                                                                                                                                                                                           |                                                |
|-----------------------------------------------------------------------------------------------------------------------------------------------------------------------------------------------------------------------------------------------------------------------------------------------------------------------------------------------------------------------------------------------------------|------------------------------------------------|
| <ul style="list-style-type: none"> <li>• More than a year</li> </ul>                                                                                                                                                                                                                                                                                                                                      |                                                |
| <p>In your country, how it easy is it to get a referral to a specialist lung centre? Please choose from the following scale where 1=very easy; 2= easy; 3=neither easy nor difficult; 4=difficult; 5=very difficult.</p>                                                                                                                                                                                  | <p>Assessment of access to specialist care</p> |
| <p>How far is your centre from your home?</p> <ul style="list-style-type: none"> <li>• Less than 10 km (about 6 miles)</li> <li>• Between 10 km and 30 km (between about 6 miles and 18 miles)</li> <li>• Between 30 km and 50 km (between about 18 miles and 31 miles)</li> <li>• Between 50 km 100 km (between about 31 miles and 62 miles)</li> <li>• More than 100 km (more than 62 miles)</li> </ul> | <p>Distance between home and centre</p>        |
| <p>Do you have access to a multidisciplinary team? Yes / No</p>                                                                                                                                                                                                                                                                                                                                           | <p>Access to multidisciplinary team</p>        |
| <p>Do you have access to a specialist lung nurse? Yes / No</p>                                                                                                                                                                                                                                                                                                                                            | <p>Access to specialist nurse</p>              |
| <p>Which healthcare professional has been monitoring your IPF or PF since your diagnosis?</p>                                                                                                                                                                                                                                                                                                             | <p>Access to specialised care</p>              |

|                                                                                                                                                                                                                                                                                     |                                                                                    |
|-------------------------------------------------------------------------------------------------------------------------------------------------------------------------------------------------------------------------------------------------------------------------------------|------------------------------------------------------------------------------------|
| <ul style="list-style-type: none"> <li>• Respiratory doctor (pulmonologist ) from the specialist lung centre</li> <li>• Family doctor</li> <li>• Specialist nurse</li> <li>• Physiotherapist</li> <li>• Palliative care doctor or nurse</li> <li>• Other, please specify</li> </ul> |                                                                                    |
| <p>On average, how often do you meet your multidisciplinary team to discuss your condition?</p> <ul style="list-style-type: none"> <li>• Once a month</li> <li>• Every 3 months</li> <li>• Every 6 months</li> <li>• Every 12 months</li> <li>• Other (please specify)</li> </ul>   | <p>Frequency at which the IPF/PF patient meets with the multidisciplinary team</p> |
| <p>Following your diagnosis, did you get a treatment plan for your disease? Yes / No</p>                                                                                                                                                                                            | <p>Availability of treatment plan</p>                                              |
| <p>Was your treatment plan explained clearly to you? Yes / No<br/>       If no, please tell us more.</p>                                                                                                                                                                            | <p>Understanding of treatment plan</p>                                             |

|                                                                                                                                                                                                  |                                                                             |
|--------------------------------------------------------------------------------------------------------------------------------------------------------------------------------------------------|-----------------------------------------------------------------------------|
| <p>Were you involved at any stage in the development of your treatment plan? Yes / No<br/>         If yes, how were you involved (please describe)?</p>                                          | <p>Understanding of involvement of patients in treatment plan decisions</p> |
| <p>Were you given different options for your treatment? Yes / No<br/>         If yes, please say which options.</p>                                                                              | <p>Understanding of patient's choice for treatment</p>                      |
| <p>Do you feel you got enough support from your doctors and healthcare team? Yes / No<br/>         If no, please tell us what support you would have liked to get.</p>                           | <p>Access to satisfactory support throughout the care pathway</p>           |
| <p><b>Access to medicines (only for IPF patients)</b></p>                                                                                                                                        |                                                                             |
| <p>Are you being treated with medicines for your IPF? Yes / No<br/>         If no, were you treated with any medicines in the past? Yes / No</p>                                                 | <p>Information on individual pharmacological treatment</p>                  |
| <p>In what year did you start taking medicines for your IPF?</p>                                                                                                                                 | <p>Information on individual pharmacological treatment</p>                  |
| <p>Did you have to change your medicines at any point? Yes / No<br/>         If yes, please say why you had to change.</p>                                                                       | <p>Information on individual pharmacological treatment</p>                  |
| <p>Overall, how long did you have to wait from diagnosis to receiving treatment?</p> <ul style="list-style-type: none"> <li>• Less than a month</li> <li>• Between one and two months</li> </ul> | <p>Assessment of delay in access to treatment</p>                           |



|                                                                                                                                                                                                                                                                                                                                                                                                                                                                                                                 |                                                             |
|-----------------------------------------------------------------------------------------------------------------------------------------------------------------------------------------------------------------------------------------------------------------------------------------------------------------------------------------------------------------------------------------------------------------------------------------------------------------------------------------------------------------|-------------------------------------------------------------|
| <ul style="list-style-type: none"> <li>• Between two and six months</li> <li>• Between six and twelve months</li> <li>• More than a year</li> </ul>                                                                                                                                                                                                                                                                                                                                                             |                                                             |
| <p>In case you started late taking medicines, what are the main reasons?</p> <ul style="list-style-type: none"> <li>• Late diagnosis</li> <li>• Not referred in time to a specialist lung centre</li> <li>• Treatment not available for sale in your country</li> <li>• Treatment is not paid for</li> <li>• Treatment is only partially paid for</li> <li>• Treatment is not reimbursed for your type of IPF</li> <li>• Treatment is not prescribed by your centre</li> <li>• Other, please explain</li> </ul> | <p>Referral to pharmacological treatment</p>                |
| <p>Are you fully (100%) covered for the costs of medicines by health insurance or the health service in your country? Yes / No</p>                                                                                                                                                                                                                                                                                                                                                                              | <p>Coverage of pharmacological treatment: reimbursement</p> |
| <p>If no, how much do you have to pay for medicines out of your own pocket each year?</p> <ul style="list-style-type: none"> <li>• Less than €200</li> </ul>                                                                                                                                                                                                                                                                                                                                                    | <p>Out-of-pocket costs</p>                                  |

|                                                                                                                                                                                                                                                                                                                                                                                                                                                   |                                                                                  |
|---------------------------------------------------------------------------------------------------------------------------------------------------------------------------------------------------------------------------------------------------------------------------------------------------------------------------------------------------------------------------------------------------------------------------------------------------|----------------------------------------------------------------------------------|
| <ul style="list-style-type: none"> <li>• Between €200 and €500</li> <li>• Between €500 and €1,000</li> <li>• Between €1,000 and €2,000</li> <li>• Between €2,000 and €5,000</li> <li>• More than €5,000</li> </ul>                                                                                                                                                                                                                                |                                                                                  |
| <p>In your opinion, what would help increase the use of medicines for treating IPF? Please choose all that apply.</p> <ul style="list-style-type: none"> <li>• Making the prescription of medicines easier for doctors</li> <li>• Encouraging family doctors to refer more patients to specialist lung centres</li> <li>• Making the procedures for reimbursement easier</li> <li>• Cheaper medicines</li> <li>• Other, please explain</li> </ul> | <p>Accessibility of pharmacological treatment: opportunities for improvement</p> |
| <p><b>Access to other treatments</b></p>                                                                                                                                                                                                                                                                                                                                                                                                          |                                                                                  |
|                                                                                                                                                                                                                                                                                                                                                                                                                                                   |                                                                                  |
| <p>Has your doctor prescribed portable oxygen therapy for you?<br/>         Yes / No</p>                                                                                                                                                                                                                                                                                                                                                          | <p>Availability of ambulatory oxygen therapy</p>                                 |

|                                                                                                                                                                                                                            |                                                  |
|----------------------------------------------------------------------------------------------------------------------------------------------------------------------------------------------------------------------------|--------------------------------------------------|
| <p>Is the cost of portable oxygen paid for by your health insurance or the health service in your country?</p> <ul style="list-style-type: none"> <li>• Yes, fully (100%)</li> <li>• Yes, in part</li> <li>• No</li> </ul> | <p>Availability of ambulatory oxygen therapy</p> |
| <p>What do you have to do to be fully or partially reimbursed?<br/>Please describe.</p>                                                                                                                                    | <p>Access to ambulatory oxygen therapy</p>       |
| <p>Has your doctor prescribed oxygen therapy for you to use at home? Yes / No</p>                                                                                                                                          | <p>Availability of oxygen therapy at home</p>    |
| <p>Is the cost of oxygen at home paid for by your health insurance or the health service in your country?</p> <ul style="list-style-type: none"> <li>• Yes, fully (100%)</li> <li>• Yes, in part</li> <li>• No</li> </ul>  | <p>Coverage of oxygen therapy at home</p>        |
| <p>What do you have to do to be fully or partially reimbursed for home oxygen therapy? Please describe.</p>                                                                                                                | <p>Access to oxygen therapy at home</p>          |
| <p>What are the main difficulties you face in accessing portable and home oxygen therapy? Please choose all that apply.</p>                                                                                                | <p>Access to oxygen therapy</p>                  |

|                                                                                                                                                                                                                                                                |                                                            |
|----------------------------------------------------------------------------------------------------------------------------------------------------------------------------------------------------------------------------------------------------------------|------------------------------------------------------------|
| <ul style="list-style-type: none"> <li>• High cost</li> <li>• No availability of liquid oxygen portables</li> <li>• No availability of portable oxygen concentrators</li> <li>• Oxygen therapy was not prescribed</li> <li>• Other (please specify)</li> </ul> |                                                            |
| <p>Do you have access to a pulmonary (lung) rehabilitation programme?</p> <ul style="list-style-type: none"> <li>• Yes, out-patient</li> <li>• Yes, in-patient</li> <li>• No, none at all</li> </ul>                                                           | <p>Availability of pulmonary rehabilitation programmes</p> |
| <p>Is the cost of the pulmonary rehabilitation programme paid for by your health insurance or the health service in your country?</p> <ul style="list-style-type: none"> <li>• Yes, fully (100%)</li> <li>• Yes, in part</li> <li>• No</li> </ul>              | <p>Coverage of pulmonary rehabilitation programme</p>      |
| <p>What do you have to do to be fully or partially reimbursed for pulmonary rehabilitation? Please describe.</p>                                                                                                                                               | <p>Access to pulmonary rehabilitation programmes</p>       |

|                                                                                                                                                                                                                                                                                                                                                                                        |                                                                                            |
|----------------------------------------------------------------------------------------------------------------------------------------------------------------------------------------------------------------------------------------------------------------------------------------------------------------------------------------------------------------------------------------|--------------------------------------------------------------------------------------------|
| <p>Do you have access to palliative care? Yes / No</p>                                                                                                                                                                                                                                                                                                                                 | <p>Availability of palliative care/ symptom relief</p>                                     |
| <p>Is palliative care paid for by your health insurance or the health service in your country?</p> <ul style="list-style-type: none"> <li>• Yes, fully (100%)</li> <li>• Yes, in part</li> <li>• No</li> </ul>                                                                                                                                                                         | <p>Coverage of palliative care</p>                                                         |
| <p>What do you have to do to be fully or partially reimbursed for palliative care? Please describe.</p>                                                                                                                                                                                                                                                                                | <p>Access to palliative care</p>                                                           |
| <p>Are you and your family involved in decisions about palliative care?</p>                                                                                                                                                                                                                                                                                                            | <p>Inclusivity of decision-making process for patients and families in palliative care</p> |
| <p>Who supported you during your treatment (whatever type of treatment you had)? Please choose all that apply.</p> <ul style="list-style-type: none"> <li>• respiratory doctor (pulmonologist)</li> <li>• radiologist</li> <li>• pathologist</li> <li>• specialist nurse</li> <li>• multidisciplinary team coordinator</li> <li>• physiotherapist</li> <li>• rheumatologist</li> </ul> | <p>Access to support structures</p>                                                        |

|                                                                                                                                                                                                                                                                                                  |                                                                      |
|--------------------------------------------------------------------------------------------------------------------------------------------------------------------------------------------------------------------------------------------------------------------------------------------------|----------------------------------------------------------------------|
| <ul style="list-style-type: none"> <li>• immunologist</li> <li>• thoracic surgeon</li> <li>• interventional pulmonologist (who uses minimally invasive endoscopic techniques)</li> <li>• psychologist</li> <li>• patient organisation or peer group</li> <li>• other, please indicate</li> </ul> |                                                                      |
| <p>Do you have access to a patient organisation to support you during your treatment? Yes / No</p>                                                                                                                                                                                               | <p>Access to support structures</p>                                  |
| <p>How would you describe your overall experience with the healthcare system in relation to your IPF or PF? Please choose from the following scale where 1= excellent; 2=good; 3=neither good nor bad; 4=bad; 5=very bad.</p>                                                                    | <p>Assessment of patient's journey</p>                               |
| <p><b>Research</b></p>                                                                                                                                                                                                                                                                           |                                                                      |
|                                                                                                                                                                                                                                                                                                  |                                                                      |
| <p>Are you aware of any ongoing clinical trials? Yes / No</p>                                                                                                                                                                                                                                    | <p>Availability/ accessibility of information on clinical trials</p> |

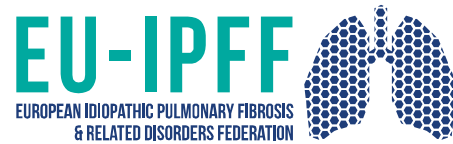

|                                                                                                                         |                                                             |
|-------------------------------------------------------------------------------------------------------------------------|-------------------------------------------------------------|
| Were you ever asked to be involved in a clinical trial? Yes / No                                                        | Availability of information on clinical trials for patients |
| Have you ever taken part in a clinical trial? Yes / No                                                                  | Availability of information on clinical trials for patients |
| <b>Your suggestions</b>                                                                                                 |                                                             |
| Please tell us how you feel the experience of patients and carers could be improved at different stages of the disease. | General recommendations                                     |

Thank you for completing this survey.
