# Supplementary material for: Gaps in care of patients living with pulmonary fibrosis: a joint patient and expert statement on the results of a Europe-wide survey
Source: PubMed Central journal article supplement — ERJ Open Res. 2019 Oct 21;5(4):00124-2019. doi: 10.1183/23120541.00124-2019 (PMC6801215; doi:10.1183/23120541.00124-2019), 2019-10-21
Supplement: 00124-2019.S2.pdf [file 00124-2019.S2.pdf]

## Questionnaire for healthcare professionals on the patient’s journey through Idiopathic Pulmonary Fibrosis (IPF) and other forms of Pulmonary Fibrosis (PF)

Time to complete: 30 minutes

- English only
- Online distribution

| <b>General information</b>                                                                                        |                                                                                                              |
|-------------------------------------------------------------------------------------------------------------------|--------------------------------------------------------------------------------------------------------------|
| <b>Indicators</b>                                                                                                 | <b>Outcomes</b>                                                                                              |
| I am a doctor / nurse                                                                                             | Relationship with the patient                                                                                |
| Your organisation’s name and location                                                                             | Location of organisation (country)                                                                           |
| Your country of residence                                                                                         | Geographical distribution                                                                                    |
| Is your organisation a recognised Centre of Expertise specialising in interstitial lung diseases (ILDs)? Yes / No | Differentiation of answers between centres for expertise specialising in ILDs and other healthcare providers |
| Is your organisation a member of ERN-LUNG? Yes / No                                                               | Understanding of similarities between ERN-LUNG centres relative to other healthcare providers                |

| <b>Epidemiological data</b>                                                                                |                                           |
|------------------------------------------------------------------------------------------------------------|-------------------------------------------|
| <b>Indicators</b>                                                                                          | <b>Outcomes</b>                           |
| How many patients with Idiopathic Pulmonary Fibrosis (IPF) are managed in your centre each year?           | Prevalence of IPF patients in each centre |
| How many patients with Pulmonary Fibrosis (PF), but excluding IPF, are managed in your centre each year?   | Prevalence of PF patients in each centre  |
| How many new patients were diagnosed with IPF within the past 12 months at your centre?                    | Incidence of IPF patients in each centre  |
| How many new patients have been diagnosed with other forms of PF within the past 12 months at your centre? | Incidence of PF patients in each centre   |
| Is there a national registry for IPF in your country? Yes / No                                             | Presence of IPF registry at country level |
| Is there a registry for IPF in your centre? Yes / No                                                       | Presence of IPF registry at centre level  |
| Is there a national registry for other forms of PF in your country? Yes / No                               | Presence of PF registry at country level  |
| Is there a registry for PF in your centre? Yes / No                                                        | Presence of PF registry at centre level   |
| Do you contribute to the collection of registry data? Yes / No                                             | Involvement in IPF registry               |
| <b>Interactions between doctors and patients</b>                                                           |                                           |
| <b>Indicators</b>                                                                                          | <b>Outcomes</b>                           |

|                                                                                                                                                                                                                                                         |                                                                                               |
|---------------------------------------------------------------------------------------------------------------------------------------------------------------------------------------------------------------------------------------------------------|-----------------------------------------------------------------------------------------------|
| <p>Have you received training to effectively communicate information on diagnosis and treatment to IPF and PF patients and carers? Yes / No<br/>                 If yes, please specify the training.</p>                                               | <p>Understanding of existence or lack of specific training for interactions with patients</p> |
| <p>Do you feel equipped to give clear and easy-to-understand information to IPF and PF patients and carers? (Please choose from the following scale where 1=strongly agree; 2=agree; 3=neither agree nor disagree; 4=disagree; 5=strongly disagree)</p> | <p>Understanding of personal opinion on ability to interact with patients</p>                 |
| <p>Do you feel you have enough time to discuss their diagnosis with patients? (Please choose from the following scale where 1=strongly agree; 2=agree; 3=neither agree nor disagree; 4=disagree; 5=strongly disagree)</p>                               | <p>Assessment of time availability for diagnosis</p>                                          |
| <p>Do you feel you have enough time to discuss their treatment with patients? (Please choose from the following scale where 1=strongly agree; 2=agree; 3=neither agree nor disagree; 4=disagree; 5=strongly disagree)</p>                               | <p>Assessment of time availability for treatment</p>                                          |
| <p>Does your centre offer training or educational activities to IPF and PF patients? Yes / No<br/>                 If yes, please specify.</p>                                                                                                          | <p>Existence of dedicated training for IPF and PF patients</p>                                |

|                                                                                                                                                                                                                                                  |                                                        |
|--------------------------------------------------------------------------------------------------------------------------------------------------------------------------------------------------------------------------------------------------|--------------------------------------------------------|
| How do you think interactions with patients could be improved?                                                                                                                                                                                   | Recommendations                                        |
| <b>Screening</b>                                                                                                                                                                                                                                 |                                                        |
| <b>Indicators</b>                                                                                                                                                                                                                                | <b>Outcomes</b>                                        |
| Does your centre have access to genetic testing to diagnose IPF and PF? Yes / No                                                                                                                                                                 | Availability of genetic testing to diagnose IPF and PF |
| If yes, is the test provided to IPF and PF patients in your centre or in another centre? <ul style="list-style-type: none"> <li>• In my centre</li> <li>• In another centre</li> </ul>                                                           | Access to molecular testing for IPF and PF patients    |
| Does your centre have access to genetic counselling? Yes / No. Please specify for both answers.                                                                                                                                                  | Availability of genetic counselling                    |
| If yes, is it provided to IPF and PF patients?                                                                                                                                                                                                   | Access to genetic counselling for IPF and PF patients  |
| <b>Referral pathway</b>                                                                                                                                                                                                                          |                                                        |
| <b>Indicators</b>                                                                                                                                                                                                                                | <b>Outcomes</b>                                        |
| In your country, how easy is it to identify a centre of expertise specialising in ILDs for IPF and PF patients? (Please choose from the following scale where 1=very easy; 2=easy; 3=neither easy nor difficult; 4=difficult; 5=very difficult). | Assessment of access to specialist care                |

|                                                                                                                                                                                                                                                                                                                                                                                                                                                                                                                                                                                                                          |                                                                |
|--------------------------------------------------------------------------------------------------------------------------------------------------------------------------------------------------------------------------------------------------------------------------------------------------------------------------------------------------------------------------------------------------------------------------------------------------------------------------------------------------------------------------------------------------------------------------------------------------------------------------|----------------------------------------------------------------|
| <p>Do IPF and PF patients have access to a multidisciplinary? Yes / No</p>                                                                                                                                                                                                                                                                                                                                                                                                                                                                                                                                               | <p>Access to multidisciplinary team</p>                        |
| <p>Do IPF and PF patients have access to a specialist ILD nurse? Yes / No</p>                                                                                                                                                                                                                                                                                                                                                                                                                                                                                                                                            | <p>Access to specialist ILD nurse</p>                          |
| <p>Which of the following professionals is part of the multidisciplinary team or supportive interdisciplinary team?<br/>       (Please tick all that apply)</p> <ul style="list-style-type: none"> <li>• consultant respiratory physician or pulmonologist</li> <li>• consultant thoracic radiologist</li> <li>• consultant pathologist</li> <li>• interstitial lung disease specialist nurse</li> <li>• multidisciplinary team coordinator</li> <li>• physiotherapist</li> <li>• rheumatologist</li> <li>• immunologist</li> <li>• thoracic surgeon</li> <li>• pharmacist</li> <li>• other (please describe)</li> </ul> | <p>Understanding of composition of multidisciplinary teams</p> |

|                                                                                                                                                                                                                                                                                                                                         |                                                                             |
|-----------------------------------------------------------------------------------------------------------------------------------------------------------------------------------------------------------------------------------------------------------------------------------------------------------------------------------------|-----------------------------------------------------------------------------|
| <p>On average, how often do you or the multidisciplinary team review an IPF or PF patient's case?</p> <ul style="list-style-type: none"> <li>• Once a week</li> <li>• Twice a month</li> <li>• Once a month</li> <li>• Every 3 months</li> <li>• Every 6 months</li> <li>• Every 12 months</li> <li>• Other (please specify)</li> </ul> | <p>Frequency of MDT review of single cases</p>                              |
| <p>On average, how often do you or the multidisciplinary team invite the IPF or PF patient to the clinic to discuss their case?</p> <ul style="list-style-type: none"> <li>• Once a month</li> <li>• Every 3 months</li> <li>• Every 6 months</li> <li>• Every 12 months</li> <li>• Other (please specify)</li> </ul>                   |                                                                             |
| <p>Are IPF and PF patients involved in developing their treatment plan? Yes / No</p>                                                                                                                                                                                                                                                    | <p>Understanding of involvement of patients in treatment plan decisions</p> |

| If yes, how?                                                                                                                                                                                                                                                                                                                                                                                                                                                                                                                                                                         |                                                 |                      |                      |               |  |  |              |  |  |                                                                                     |
|--------------------------------------------------------------------------------------------------------------------------------------------------------------------------------------------------------------------------------------------------------------------------------------------------------------------------------------------------------------------------------------------------------------------------------------------------------------------------------------------------------------------------------------------------------------------------------------|-------------------------------------------------|----------------------|----------------------|---------------|--|--|--------------|--|--|-------------------------------------------------------------------------------------|
| Do you provide different treatment and support options to your IPF and PF patient? Yes / No                                                                                                                                                                                                                                                                                                                                                                                                                                                                                          | Understanding of patient's choice for treatment |                      |                      |               |  |  |              |  |  |                                                                                     |
| How are IPF and PF patients referred to you? Please indicate the top-two options that apply: <ul style="list-style-type: none"> <li>• General practitioner</li> <li>• Pulmonologist</li> <li>• Other pulmonologist</li> <li>• Self-referral</li> <li>• Other (please specify)</li> </ul>                                                                                                                                                                                                                                                                                             | Understanding of the referral circuit           |                      |                      |               |  |  |              |  |  |                                                                                     |
| <b>Access to pharmacological treatment (specific to IPF)</b>                                                                                                                                                                                                                                                                                                                                                                                                                                                                                                                         |                                                 |                      |                      |               |  |  |              |  |  |                                                                                     |
| <b>Indicators</b>                                                                                                                                                                                                                                                                                                                                                                                                                                                                                                                                                                    | <b>Outcomes</b>                                 |                      |                      |               |  |  |              |  |  |                                                                                     |
| The following treatments for IPF are approved by the European Medicines Agency (EMA). Please indicate if they are prescribed in your country <table style="width: 100%; border-collapse: collapse;"> <thead> <tr> <th style="text-align: left; width: 30%;"><b>Active substance</b></th> <th style="text-align: center; width: 30%;"><b>Available</b></th> <th style="text-align: center; width: 30%;"><b>Not available</b></th> </tr> </thead> <tbody> <tr> <td>• Pirfenidone</td> <td></td> <td></td> </tr> <tr> <td>• Nintedanib</td> <td></td> <td></td> </tr> </tbody> </table> | <b>Active substance</b>                         | <b>Available</b>     | <b>Not available</b> | • Pirfenidone |  |  | • Nintedanib |  |  | Availability of specific pharmacological treatment for IPF patients in your country |
| <b>Active substance</b>                                                                                                                                                                                                                                                                                                                                                                                                                                                                                                                                                              | <b>Available</b>                                | <b>Not available</b> |                      |               |  |  |              |  |  |                                                                                     |
| • Pirfenidone                                                                                                                                                                                                                                                                                                                                                                                                                                                                                                                                                                        |                                                 |                      |                      |               |  |  |              |  |  |                                                                                     |
| • Nintedanib                                                                                                                                                                                                                                                                                                                                                                                                                                                                                                                                                                         |                                                 |                      |                      |               |  |  |              |  |  |                                                                                     |

| <p>Please indicate if the following EMA-approved treatments for IPF are available for prescription in your centre</p> <table border="0" style="width: 100%;"> <thead> <tr> <th style="text-align: left;"><b>Active substance</b></th> <th style="text-align: center;"><b>Available</b></th> <th style="text-align: center;"><b>Not available</b></th> </tr> </thead> <tbody> <tr> <td>• Pirfenidone</td> <td></td> <td></td> </tr> <tr> <td>• Nintedanib</td> <td></td> <td></td> </tr> </tbody> </table> | <b>Active substance</b>                                             | <b>Available</b>     | <b>Not available</b> | • Pirfenidone |  |  | • Nintedanib |  |  | <p>Availability of pharmacological treatment for IPF patients in your centre</p> |
|-----------------------------------------------------------------------------------------------------------------------------------------------------------------------------------------------------------------------------------------------------------------------------------------------------------------------------------------------------------------------------------------------------------------------------------------------------------------------------------------------------------|---------------------------------------------------------------------|----------------------|----------------------|---------------|--|--|--------------|--|--|----------------------------------------------------------------------------------|
| <b>Active substance</b>                                                                                                                                                                                                                                                                                                                                                                                                                                                                                   | <b>Available</b>                                                    | <b>Not available</b> |                      |               |  |  |              |  |  |                                                                                  |
| • Pirfenidone                                                                                                                                                                                                                                                                                                                                                                                                                                                                                             |                                                                     |                      |                      |               |  |  |              |  |  |                                                                                  |
| • Nintedanib                                                                                                                                                                                                                                                                                                                                                                                                                                                                                              |                                                                     |                      |                      |               |  |  |              |  |  |                                                                                  |
| <p>Please indicate if the following EMA-approved treatments for IPF are fully (100%) reimbursed or not in your country</p> <ul style="list-style-type: none"> <li>• Pirfenidone Yes / No</li> <li>• Nintedanib Yes / No</li> </ul> <p>If no, please elaborate.</p>                                                                                                                                                                                                                                        | <p>Reimbursement of pharmacological treatment for IPF patients</p>  |                      |                      |               |  |  |              |  |  |                                                                                  |
| <p>Are there any inclusion or exclusion criteria when administering the following treatments:</p> <ul style="list-style-type: none"> <li>• Pirfenidone Yes / No</li> <li>• Nintedanib Yes / No</li> </ul> <p>If yes, please specify.</p>                                                                                                                                                                                                                                                                  | <p>Criteria for administering EMA-approved treatment</p>            |                      |                      |               |  |  |              |  |  |                                                                                  |
| <p>Are there any barriers to prescribing EMA-approved IPF treatments in your centre? Please select all that apply</p> <ul style="list-style-type: none"> <li>• Severity of disease (mild, moderate, severe)</li> </ul>                                                                                                                                                                                                                                                                                    | <p>Limitation to prescription of IPF pharmacological treatments</p> |                      |                      |               |  |  |              |  |  |                                                                                  |



|                                                                                                                                                                                                                                                                                                                                                                                                                                                                                  |                                                                              |
|----------------------------------------------------------------------------------------------------------------------------------------------------------------------------------------------------------------------------------------------------------------------------------------------------------------------------------------------------------------------------------------------------------------------------------------------------------------------------------|------------------------------------------------------------------------------|
| <ul style="list-style-type: none"> <li>• Disease progress</li> <li>• Patient clinical status</li> <li>• Age</li> <li>• Other, please explain</li> </ul>                                                                                                                                                                                                                                                                                                                          |                                                                              |
| <p>What is the average time from suspected diagnosis to starting treatment with Nintedanib or Pirfenidone?</p> <ul style="list-style-type: none"> <li>• Less than a month</li> <li>• Between 1 month and 6 months</li> <li>• Between 6 months and 1 year</li> <li>• More than a year</li> </ul>                                                                                                                                                                                  | <p>Delay in access to pharmacological treatment from suspected diagnosis</p> |
| <p>If IPF patients in your centre experience delays in accessing treatment, what are the main reasons for the delay? Please select all that apply</p> <ul style="list-style-type: none"> <li>• Wrong recognition of symptoms and signs</li> <li>• Time from suspected diagnosis to confirmed diagnosis</li> <li>• Delays in referral to a centre specialising in ILDs</li> <li>• Treatment not available for sale in your country</li> <li>• Treatment not reimbursed</li> </ul> | <p>Reasons for delay in access to treatment</p>                              |

|                                                                                                                                                                                                                                                                                                                       |                                                                     |
|-----------------------------------------------------------------------------------------------------------------------------------------------------------------------------------------------------------------------------------------------------------------------------------------------------------------------|---------------------------------------------------------------------|
| <ul style="list-style-type: none"> <li>• Treatment only partially reimbursed</li> <li>• Treatment not reimbursed for all types of IPF or PF</li> <li>• Treatment not prescribed by your centre</li> <li>• Other, please explain</li> </ul>                                                                            |                                                                     |
| <p>Do you have patients who might benefit from access to pharmacological treatment but who are not eligible?</p> <ul style="list-style-type: none"> <li>• No</li> <li>• Less than 10%</li> <li>• Less than 30%</li> <li>• More than 30%</li> </ul>                                                                    | <p>Barriers to accessing pharmacological treatment</p>              |
| <p>In your opinion, what would improve access to treatment for IPF patients?</p> <ul style="list-style-type: none"> <li>• No limitations for prescription</li> <li>• Reimbursement</li> <li>• Timely referral to specialist ILD centre</li> <li>• Better pricing policies</li> <li>• Other, please explain</li> </ul> | <p>Opportunities to improve access to pharmacological treatment</p> |
| <p><b>Access to non-pharmacological treatment</b></p>                                                                                                                                                                                                                                                                 |                                                                     |

| <b>Indicators</b>                                                                                                                                 | <b>Outcomes</b>                                                  |
|---------------------------------------------------------------------------------------------------------------------------------------------------|------------------------------------------------------------------|
| Does your centre prescribe ambulatory oxygen for IPF and PF patients? Yes / No                                                                    | Availability of ambulatory oxygen therapy                        |
| Is ambulatory oxygen reimbursed? Yes / No / Partially                                                                                             | Access to ambulatory oxygen therapy                              |
| Can your centre prescribe oxygen for IPF and PF patients to use at home? Yes / No                                                                 | Availability of oxygen for use at home                           |
| Is oxygen for use at home reimbursed? Yes / No / Partially                                                                                        | Access to oxygen for use at home                                 |
| Can your centre prescribe pulmonary rehabilitation for IPF and PF patients? Yes / No                                                              | Availability of rehabilitation programmes                        |
| Is pulmonary rehabilitation reimbursed? Yes / No / Partially                                                                                      | Access to rehabilitation programmes                              |
| Can your centre prescribe medication for palliative care or symptom relief for IPF and PF patients? Yes / No                                      | Availability of palliative care and symptom relief               |
| When do you start palliative care or symptom relief for IPF and PF patients? Please specify according to the stage of progression of the disease. | Meaning of palliative care in IPF and PF for doctors             |
| Is end-of-life care discussed with IPF and PF patients and their families? Yes / No                                                               | Inclusivity of decision-making process for patients and families |
| In your country, what are the eligibility criteria for a lung transplant? Please select all the criteria that apply.                              |                                                                  |

|                                                                                                                                                                                                                                                                                                                                                                                                                       |                                              |
|-----------------------------------------------------------------------------------------------------------------------------------------------------------------------------------------------------------------------------------------------------------------------------------------------------------------------------------------------------------------------------------------------------------------------|----------------------------------------------|
| <ul style="list-style-type: none"> <li>• Age, please specify</li> <li>• General health condition</li> <li>• Likelihood of developing risks associated with transplant (for example, infections, rejection of new lung)</li> <li>• Severity of IPF or PF</li> <li>• Progression of IPF or PF</li> <li>• Availability of organs</li> <li>• Surgical procedure not available</li> <li>• Other, please specify</li> </ul> |                                              |
| <p>In patients eligible for lung transplantation, do you refer these patients for a lung transplant? Yes / No</p>                                                                                                                                                                                                                                                                                                     | <p>Availability of lung transplantations</p> |
| <p>Do patients in your centre have access to psychological support such as counselling? Yes / No.<br/>             If yes, please specify if psychological support is reimbursed: Yes / No / Partially</p>                                                                                                                                                                                                            | <p>Access to psychological support</p>       |
| <p>Do patients in your centre have access to educational materials on IPF and PF?</p>                                                                                                                                                                                                                                                                                                                                 | <p>Access to educational materials</p>       |
| <p><b>Research</b></p>                                                                                                                                                                                                                                                                                                                                                                                                |                                              |

| <b>Indicators</b>                                                                                                                                                                                                                                                                                                               | <b>Outcomes</b>                                             |
|---------------------------------------------------------------------------------------------------------------------------------------------------------------------------------------------------------------------------------------------------------------------------------------------------------------------------------|-------------------------------------------------------------|
| Are you aware of current IPF and PF clinical trials? Yes / No<br>If yes, please state which trials.                                                                                                                                                                                                                             | Availability of information on clinical trials in general   |
| Do you tell IPF and PF patients that they could take part in clinical trials? Yes / No<br>If yes, please specify if: <ul style="list-style-type: none"> <li>• your centre participates in trials</li> <li>• your centre refers patients for trials to another centre</li> <li>• you refer to the patient association</li> </ul> | Availability of information on clinical trials for patients |
| <b>General recommendations</b>                                                                                                                                                                                                                                                                                                  |                                                             |
| Please share your suggestions for improving the patient's experience of the IPF or PF journey.                                                                                                                                                                                                                                  | General recommendations                                     |

Thank you for completing this survey.
